# Supplementary material
Source: Springer Nature journal article supplement (https://www.springermedizin.de/resource/supplementary/12985_2009_576_MOESM5_ESM.pdf/9608488)

A)

Mutant

COX-IV

Merge

CTD

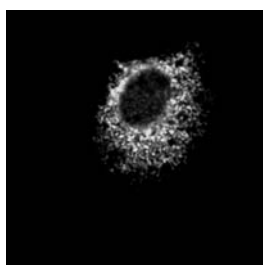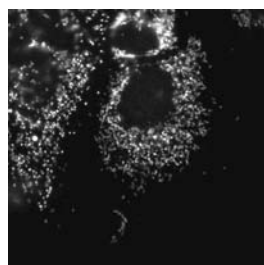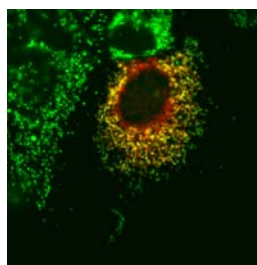

118

261

d-LDH MBD

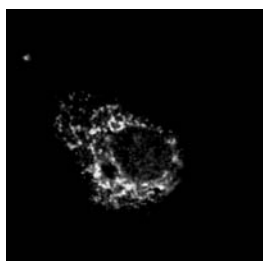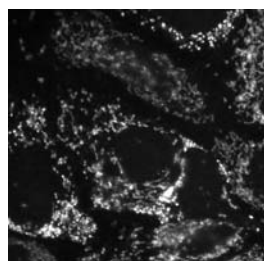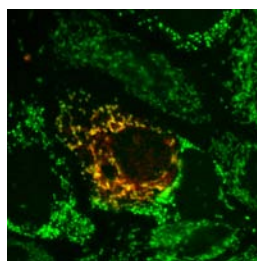

319

390

TripleE

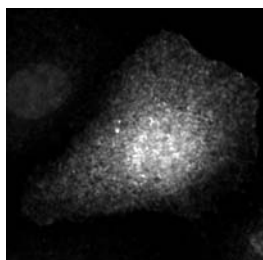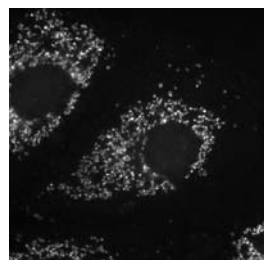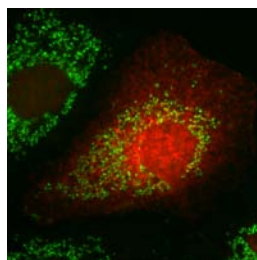

E E E  
K247  
R248  
H250

Helix-swop

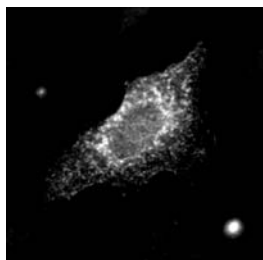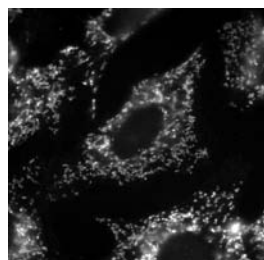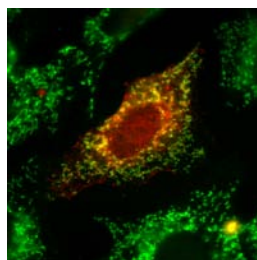

378 PPRMKNWRDK 387  
LKRHLQWINE  
246 255

B)

d-LDH MBD

CTD

Merge

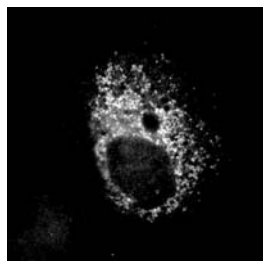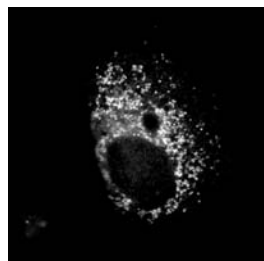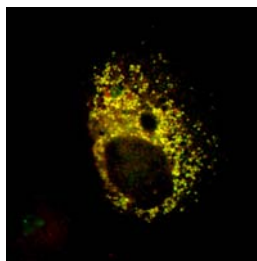

Supplement: MOESM5 [file 9608488]
